# Supplementary material for: Development of Machine Learning Models Predicting Estimated Blood Loss during Liver Transplant Surgery
Source: MDPI journal article supplement (doi:10.3390/jpm12071028), 2022-06-23
Supplement: s1 [file s1]

**Supplementary Table S1. Included 59 features**

| Ranking | Features                                                      |
|---------|---------------------------------------------------------------|
| 1       | Hepatocellular carcinoma                                      |
| 2       | Activated partial thromboplastin time (aPTT)                  |
| 3       | Blood urea nitrogen                                           |
| 4       | Operation time                                                |
| 5       | Body temperature                                              |
| 6       | MELD (Model for End-Stage Liver Disease) Score                |
| 7       | Mean arterial pressure                                        |
| 8       | Creatinine                                                    |
| 9       | Pulse pressure                                                |
| 10      | Hemoglobin                                                    |
| 11      | Trans-Arterial Chemo-Embolization (TACE)                      |
| 12      | Respiratory rate                                              |
| 13      | Preoperative continuous renal replacement therapy             |
| 14      | Fresh frozen plasma transfusion in the preoperative period    |
| 15      | Albumin                                                       |
| 16      | INR(Prothrombin time)                                         |
| 17      | Estimated Glomerular Filtration Rate                          |
| 18      | Hepatitis B virus carrier                                     |
| 19      | Platelet count                                                |
| 20      | Liver cirrhosis                                               |
| 21      | Platelet concentration transfusion in the preoperative period |
| 22      | Alcoholic liver cirrhosis                                     |
| 23      | Norepinephrine infusion rate (mcg/kg/min)                     |
| 24      | Surgical past history                                         |

|    |                                     |
|----|-------------------------------------|
| 25 | SpO2                                |
| 26 | Anesthetic agent                    |
| 27 | Body mass index                     |
| 28 | Weight                              |
| 29 | Heart rate                          |
| 30 | IgG antibody titer                  |
| 31 | Huge collateral on CT               |
| 32 | External beam radiation therapy     |
| 33 | ABO incompatibility                 |
| 34 | Total intravenous anesthesia        |
| 35 | Desflurane                          |
| 36 | Hepatitis C virus carrier           |
| 37 | Heparin user                        |
| 38 | Portal vein thrombosis on CT        |
| 39 | Age                                 |
| 40 | Sex                                 |
| 41 | Robot donor                         |
| 42 | Height                              |
| 43 | Radiofrequency Ablation             |
| 44 | RBC transfusion                     |
| 45 | IgM antibody titer                  |
| 46 | Planned splenectomy                 |
| 47 | Emergency                           |
| 48 | Living or deceased donor            |
| 49 | Taking only aspirin                 |
| 50 | Taking both aspirin and clopidogrel |
| 51 | Taking only clopidogrel             |
| 52 | Taking lixiana                      |

|    |                                                 |
|----|-------------------------------------------------|
| 53 | Taking cilostazol                               |
| 54 | Anesthesia with both sevoflurane and desflurane |
| 55 | Vasopressin infusion rate (unit/hr)             |
| 56 | Yttrium-90 Selective Internal Radiation Therapy |
| 57 | Intra-arterial Chemotherapy                     |
| 58 | Narrow portal vein on CT                        |
| 59 | Hepatic artery thrombosis on CT                 |

**Supplementary Table S2. machine learning model specifics.**

| Method                    | Hyperparameter                                                                                                                                                                 |                                                                |
|---------------------------|--------------------------------------------------------------------------------------------------------------------------------------------------------------------------------|----------------------------------------------------------------|
|                           | Model specification and search grids                                                                                                                                           | Selected value                                                 |
| Elastic net               | $\lambda$ : 500 equally spaced values in logarithmic scale between $10^{-6}$ and $10^{10}$<br>$\alpha$ : 0, 0.1, 0.2, 0.3, 0.4, 0.5, 0.6, 0.7, 0.8, 0.9, 1                     | $\lambda$ : 0.1813498<br>$\alpha$ : 0                          |
| Random forests            | mtry: 1, 2, 3, 4, 5, 6, 7, 8                                                                                                                                                   | mtry: 1                                                        |
| Extreme gradient boosting | Number of rounds: 1000 (early stopping with patience 20)                                                                                                                       | Iteration : 21                                                 |
|                           | Maximum depth: 3, 5                                                                                                                                                            | Maximum depth: 3                                               |
|                           | Collection sample bytree: 0.7                                                                                                                                                  | Collection sample bytree: 0.7                                  |
|                           | eta: 0.05, 0.1                                                                                                                                                                 | eta: 0.05                                                      |
|                           | gamma: 0, 1, 2                                                                                                                                                                 | gamma: 2                                                       |
|                           | Minimum sum of instance weight (hessian) needed in a child : 3, 5                                                                                                              | Minimum sum of instance weight (hessian) needed in a child : 5 |
|                           | subsample: 0.5                                                                                                                                                                 | subsample: 0.5                                                 |
| Neural networks           | Input layer with 8 nodes, two hidden layers with varying numbers of nodes with the relu activation, output layer of one node with the sigmoid activation, dropout with varying | Dropout: 0.3<br>Batch size: 32<br>Number of nodes in hidden    |

---

rates applied for both hidden layers, and layers: 10  
epochs set to 1000 with early stopping  
patience 20.

Dropout: 0.2, 0.3

Batch size: 8, 16, 32,

Number of nodes in hidden layers: 10, 15, 20.

---
